# Supplementary material for: The Half-Size ABC Transporter FOLDED PETALS 2/ABCG13 Is Involved in Petal Elongation through Narrow Spaces in Arabidopsis thaliana Floral Buds
Source: Plants (Basel). 2014 Aug 15;3(3):348–58. doi: 10.3390/plants3030348 (PMC4844351; doi:10.3390/plants3030348)
Supplement: Supplementary File 1 [file plants-03-00348-s001.pdf]

## Supplementary Material

**Figure S1.** (a) WS petal. (b) Wrinkled and unfolded petal in *fop2-1*. Arrowheads indicate the wrinkled sites. Bars: 1 mm. (c) Petal character of WS, *fop2*, and *fop1* mutants. Examined flower number: WS, 20; *fop2-1*, 58; *fop2-2*, 38; *fop1-1*, 26.

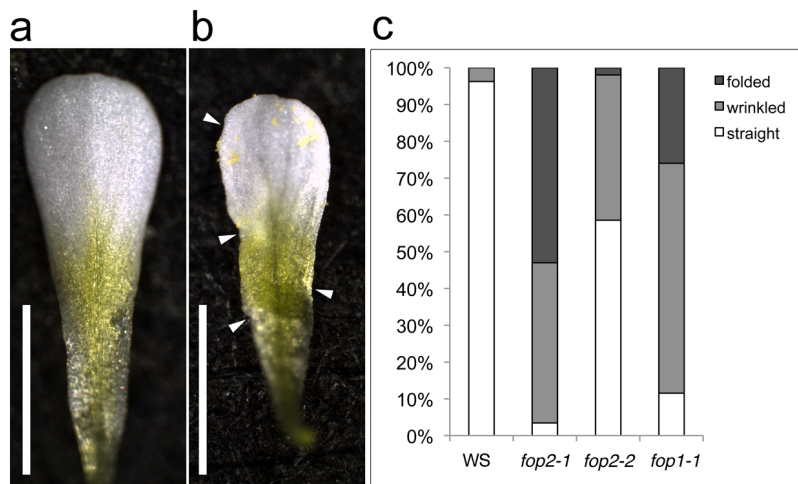

**Figure S2.** Sepal removal at early stage restores straight elongation of petals in *fop2-1* and *fop1-1 fop2-1* mutant flowers. Flowers with red square are with folded petals. *fop2-1*: n = 12, *fop1-1 fop2-1*: n = 16.

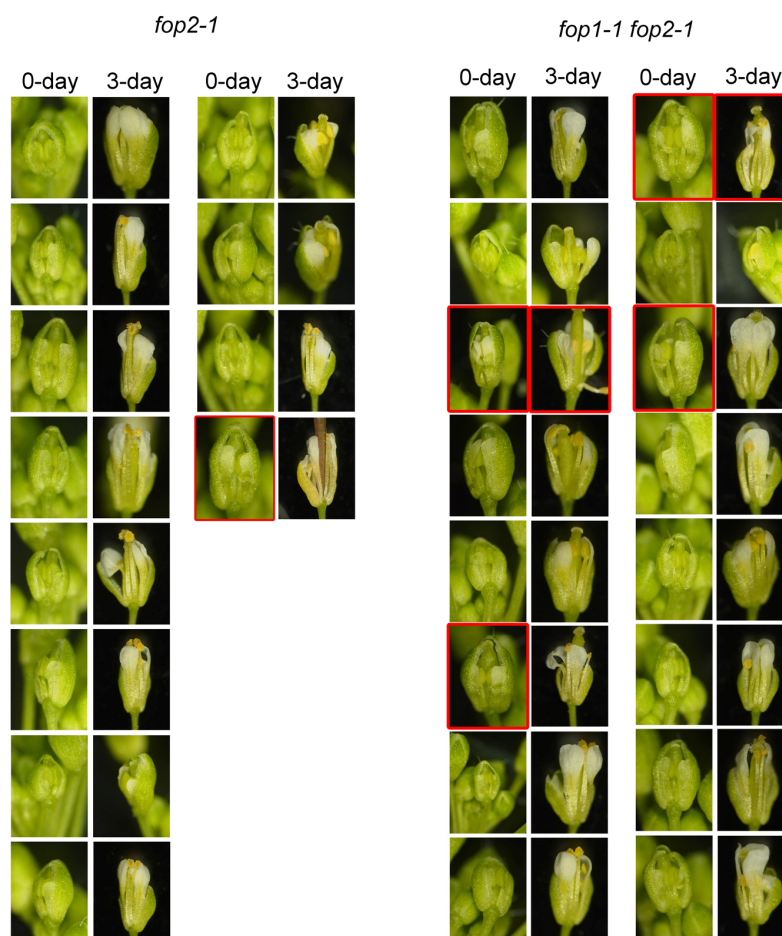

**Figure S3.** *FOP2/Atlg51460* genomic sequence. Bold letters represent exons. Marked nucleotides by red and blue indicate the point mutation in *fop2-1* (changed to T) and 15 bp deletion caused by T-DNA insertion in *fop2-2/SALK\_046735*, respectively.

acacttttctctcccaagaacacaaaaaaactcttaagctagaacaagtttaaaactcttcgctcagttttcgatctatct  
aacaaaagcatac**ATGACTACGCCGAGGGGGCGATGTTATGTGGCGTGGGAGGATCTTACGGTGGTGATACCAACTTCGGTGAA**  
**GGAGCAACTAAGAGATTACTGAATGGAGTGAATGGTGTGGTGAGCCAAATAGGATCTTAGCTATTATGGGTCCCTCAGGTTGAG**  
**GCAATCTACGCTTCTTGATGCTTAGCAG**gtcccttctctctctcagacacacacacccatacatgtccaagattagctcgct  
gtttttattatgtatttcttttattgttaaatggttttctctctattatataaatctcaataagctgaagcaacatcgaccaaca  
attaaaagatatagtttttagaggaatttaacaaccaaccacatttagctttgaaaccaacattaaaggatgagacttaccact  
ttgaacctagatttagtggaatcgctctatgtactctatatatatataataactataattaacaatatatgacgttatgt  
ctttcttttaaaaaattgtccaaggaaacttctcaataactatgtaaaaagtggttcaacttttgaaaaataagaaattctgt  
tttcttacattaaaaatattcacaaactcttttagtaatttttatttggaaattgataaggatttctgccattcgtagttaaat  
gagaatataagttagattttatttggtagatatatatatatatatataggtgtatgtctgtgctgggtgggtgtgtgt  
cctattcaacataaaatatttaattattttaacctgtaaatcgtatgtaatacaaaataactaatatgatacttgattagttt  
ttgttatattgaaaaatacattactacaataaaattgataactttctctatttgaagcaacaaactatgtacatactgtatcag  
tatcacaatttgggtgaatgaaaatattaactgaagttttgtactcttctgtaatttttttttttcttctgtaactttgac  
caacgtaacatatatatgtaaaagaatttgagagcatgatataacatatttatgtatcaagattttataactattgaaaa  
acagtgctatatatttatacttaagtttcatgtacacgatgagacatatagatatatttcaactttattatttgattggatttagcta  
ccaatttttatttttaagtatatctatctatcgagtagtaactaaataaattataaaaaaaataagttgcaattttcatgttct  
taattaataaatttacatcgctcgtagatttagtattgaataaattgatagttacgttttcttaacgtagactatgtacagaaatt  
ttgacgttaacatttcttattaaatcatattttaaattgtaaccaactaccaatcaccatattctgacacaaatatttaggattg  
cacgatcgtagcttcataccgacttgcgatctcttcacaagttgtaaccggtttgggtgactggtcggaactctttgaggtatgta  
cgttcaatccaaaaacaatccaaatcgattatttttcttgaccaaacctaaatttgattggattaagaagatctttattttat  
gcttatgactaatcgaaaccaatttaattttactgtggctaattattctgtaaaaagcgaaaaacccaaacccgggttataagatt  
gttctatcaatgctataagattgttcaaaaacatgaaagatttaacatctaacattaaaggttaaatttggtagtggtacag**GAA**  
**GATTAGCAGGGGAATGTTGTAATGAGTGGCAAGTACTTGTCAATGGCAAGAAGAGAAGACTTGACTTGGTGCTGCC**gtaaaaa  
atttatcttttctcttttagttttacccttttacacaatcaaaactattattattcatgaatgtcctaaactctcag**GCTTATGTG**  
**ACGCAAGAAGATGTGTGTGCTAGGAACCTTGACAGTGAGAGAATCCATATCTTACTCGGCTCATCTCAGGCTCCCTTCAAGCTTA**  
**CCAGAGAAGAGATCAGTGACATTGTGGAAGCTACAATCACTGACATGGGTCTTGAAGAATGTTTCAGACAGGACCATTGGAACTG**  
**GCATTTGCGTGGAAATAAGCGGAGGAGAGAAGAAACGGCTTAGTATTGCCCTCGAGGTCTTAACAAAACCAAGTCTCCCTTTCTA**  
**GACGAACCAACTAGTGGACTGGACAGTGCTTCAGCTTTCTTCGTGGTT**C**AGATTCTTAGAAACATAGCAAGCAGTGGCAAACTG**  
**TGGTTCTTCGATCCATCAGCCGAGTGGTGAGGTTTTCGCCCTTTTGATGACCTGCTACTTCTGTCTGGAGGAGAACTGTTTA**  
**CTTTGGCGAAGCAGAATCTGCAACAAAG**gtaataagatagagcattggcaagagtataataaccattatgctcatttgtgtgtgt  
ttgcttcgacattgag**TTCTTTGGTGAAGCAGGTTT**CTCTTGTCCAAAGTAGACGGAATCCATCAGACCATTCTTCGCTGTGT  
**CAATCCGATTTCGATAATGTCACAGCGGCTTTGGTTGAATCTCGGAGAATCAAC**gtttggttttctctctgcccctctgtttttt  
catgaacttacaatactctcaagcttttgacctcgacctttacatctgcag**GATTCACTTTCTCTCTTCCACCACTACATGAA**  
**ACTACAAACACATTAGATCTCTGGATGATATACCAACTGCAGAAATAGAACACACTTGTTCAGAAAATTAAGTGTTCACTTT**  
**ATGCAGCAGCTTCAAGAGCAAGAATTCAGAAATAGCATCGATA**gtaagttacggttactacttcccttaaaactacaatgtatc  
acataatgagagttctcataagcacagttataaaccttgtgcaacag**GTGGGGATTGTCACAGAAAGGAAAAGGGGAGCCAACT**  
**AATTTGGTGAAACAACTCAGAACTTACTCAGCGATCTTTCATCAACATGAGTAGAGACTTGGGGTACTACTGGATGCGGATTG**  
**CAGTCTACATAGTGTATCCATTGTGTCTGGGTCAATCTTCAACGTCGGGAGAAACCACACAAATGTTATGAGTACTGCAGC**  
**TTGTGGCGGATTTATGGCAGGCTTATGACATTCATGTCAATAGGAGGATTCCAATCCTTCATTGAAGAAATGAAG**gtaaaagagc  
taaacagagaaaaattctcttttctacctaataaacttatcttagtttttagcatctttattcctgaaaacag**GTGTTTTCTCGC**  
**GAAAGGCTCAATGGACACTATGGGGTTCAGTATACACTGTGTCTAATTTACTCTCCTCATTACCTTTCATAATCCTTATGTGCC**  
**TCTCCACGACTCAATCACTATCTACATGGTGAGGTTCCAATCCGAGGTTCTCATTCTTCTTACAAGTCTCGACCTTATCTG**  
**CGCGATTACAACCTGGAGAGTTGCATGATGATGATAGCTTCAGTAGTCCCTAATCTTGTGATGGGAGTCATGTTGGGAGCTGGT**  
**TACATT**gtaagagtggcctctgtcgtctttcacctacaagctttcttatatctccaaaactatttcaaatgaaaaccgcttt  
atccttcatctcatag**GGAATTATGGTGTTAAGTGCGGGTTTTTCCGATTCTTCCCCGACTTACCAATGGTGTTCTGGCGATAC**  
**CCGGTGTCTACATAAACTATGGTGCATGGGCATACAG**gtaaccaggttttctcaactttaagatgcagactatatctgcaagt  
agctatctttaaagagcatacctgataaattgcag**GGAGCATACAAGAATGAGATGATTGGGGTGGAGTATGATTCTCCGTTACC**  
**CTTGGTACCAAAATGAAAGGAGAACTCATTCTTCAAATGTTCTAGGCATAAATCCAGAAAGTTCAAAGTGGTGGATCTAGCA**  
**GTTGTGATGATGATTCTCATTGGGTATAGGATTGCTTCTTCGCCATCTTCAAGTCCGGGAAAAGGTTTTCCAGTTATTACACA**  
**TGTTATACACAAGAGAACTCTGAGCCATATCCAGAAAAGGCCCTTCTTTCAGAGAATGACACCTTCCCTTCAGGCGGATACCC**  
**TGTTACCATGCTCTCTCTCTCAGGAAGGACTTAACTCTCCACTGCATTAG**aagcatatacagcaggatgcaatttccatatat  
ttcaatgtgcagatgtcactcttcaaaactgtataaactgtttgtagccggtgtgtgaaggaaaaaaaagaaaagagagat  
actatcattctgactaatgagatttgttttagc

**Figure S4.** GUS staining in *FOP2g:GUS* flowers. **(a)** GUS stains in petals, ovules, and L1 cells of peduncles. **(b)** Higher magnification of ovules in **(a)**, showing the expression in outer and inner integuments (arrowheads). n, nucellus; ii, inner integuments; oi, outer integuments. Bars: 20  $\mu$ m.

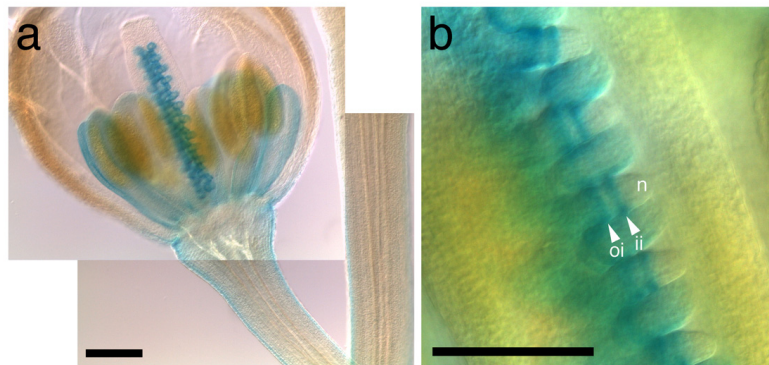

© 2014 by the authors; licensee MDPI, Basel, Switzerland. This article is an open access article distributed under the terms and conditions of the Creative Commons Attribution license (<http://creativecommons.org/licenses/by/3.0/>).
